# Supplementary material
Source: ML conference proceedings conference paper supplement (https://proceedings.mlr.press/v119/cheng20c.html)
Supplement: Supplementary file [file cheng20c-supp.pdf]

---

# Learning with Bounded Instance- and Label-Dependent Label Noise

## Supplementary Material

---

### A. Proofs

#### A.1. Proof of Theorem 1

*Proof.*  $\forall \mathbf{x} \in \text{supp}(P_{D^*}(\mathbf{X})) = \text{supp}(P_D(\mathbf{X}))$ , we have

$$\begin{aligned} g_{D^*}^*(\mathbf{x}) &= \text{sgn} \left( P_{D^*}(Y = +1|\mathbf{x}) - \frac{1}{2} \right) \\ &= \text{sgn} \left( \mathbb{1}[g_D^*(\mathbf{x}) = +1] - \frac{1}{2} \right) \\ &= g_D^*(\mathbf{x}), \end{aligned}$$

where the last equality is justified by checking the possible binary values of  $g_D^*(\mathbf{x})$ , e.g., when  $g_D^*(\mathbf{x}) = +1$ ,  $\text{sgn}(\mathbb{1}[g_D^*(\mathbf{x}) = +1] - \frac{1}{2}) = +1$ ; when  $g_D^*(\mathbf{x}) = -1$ ,  $\text{sgn}(\mathbb{1}[g_D^*(\mathbf{x}) = +1] - \frac{1}{2}) = -1$ .  $\square$

#### A.2. Proof of Theorem 2 and Corollary 1

*Proof.*  $\forall \mathbf{x} \in \mathcal{X}$ ,  $\tilde{\eta}(\mathbf{x})$  can be rewritten as

$$\begin{aligned} \tilde{\eta}(\mathbf{x}) &= P(\tilde{Y} = +1, Y = +1|\mathbf{x}) \\ &\quad + P(\tilde{Y} = +1, Y = -1|\mathbf{x}) \\ &= P(\tilde{Y} = +1|Y = +1, \mathbf{x})P(Y = +1|\mathbf{x}) \\ &\quad + P(\tilde{Y} = +1|Y = -1, \mathbf{x})P(Y = -1|\mathbf{x}) \\ &= (1 - \rho_{+1}(\mathbf{x}))\eta(\mathbf{x}) + \rho_{-1}(\mathbf{x})(1 - \eta(\mathbf{x})) \end{aligned}$$

Then, we have

$$\begin{aligned} \eta(\mathbf{x}) \geq \frac{1}{2} &\implies \tilde{\eta}(\mathbf{x}) = (1 - \rho_{+1}(\mathbf{x}))\eta(\mathbf{x}) \\ &\quad + \rho_{-1}(\mathbf{x})(1 - \eta(\mathbf{x})) \\ &\geq (1 - \rho_{+1}(\mathbf{x}))\eta(\mathbf{x}) \\ &\geq \frac{1 - UB(\rho_{+1}(\mathbf{x}))}{2} \end{aligned}$$

and its contrapositive

$$\begin{aligned} \tilde{\eta}(\mathbf{x}) < \frac{1 - UB(\rho_{+1}(\mathbf{x}))}{2} &\implies \eta(\mathbf{x}) < \frac{1}{2} \\ &\implies g_D^*(\mathbf{x}) = -1 \end{aligned}$$

The last step follows by Lemma 1. Similarly, we can prove  $\tilde{\eta}(\mathbf{x}) > \frac{1 + UB(\rho_{-1}(\mathbf{x}))}{2} \implies g_D^*(\mathbf{x}) = +1$ .

Corollary 1 holds by replacing  $UB(\rho_{+1}(\mathbf{x}))$  and  $UB(\rho_{-1}(\mathbf{x}))$  by  $\rho_{+1\max}$  and  $\rho_{-1\max}$ , respectively.  $\square$

#### A.3. Proof of Propositions 1 and 2

##### A.3.1. PROPOSITION 1

*Proof.* The following Lemma holds because of the basic Rademacher bound on the maximal deviation between the expected and empirical risks (Bartlett & Mendelson, 2002).

**Lemma A1.** For any  $\delta > 0$ , with probability at least  $1 - \delta$ , we have

$$\sup_{f \in \mathcal{F}} \left| \widehat{R}_{D^*,L}(f) - R_{D^*,L}(f) \right| \leq \mathfrak{R}(L \circ \mathcal{F}) + b \sqrt{\frac{\log(1/\delta)}{2m}}.$$

Then, with probability at least  $1 - \delta$ , we have

$$\begin{aligned} &R_{D^*,L}(\hat{f}_{D^*,L}) - R_{D^*,L}(f_{D^*,L}^*) \\ &= (R_{D^*,L}(\hat{f}_{D^*,L}) - \widehat{R}_{D^*,L}(\hat{f}_{D^*,L})) \\ &\quad + (\widehat{R}_{D^*,L}(f_{D^*,L}^*) - R_{D^*,L}(f_{D^*,L}^*)) \\ &\quad + (\widehat{R}_{D^*,L}(\hat{f}_{D^*,L}) - \widehat{R}_{D^*,L}(f_{D^*,L}^*)) \\ &\leq 2 \sup_{f \in \mathcal{F}} \left| \widehat{R}_{D^*,L}(f) - R_{D^*,L}(f) \right| \\ &\leq 2\mathfrak{R}(L \circ \mathcal{F}) + 2b \sqrt{\frac{\log(1/\delta)}{2m}}, \end{aligned}$$

where the first inequality holds because  $\hat{f}_{D^*,L} = \arg \min_{f \in \mathcal{F}} \widehat{R}_{D^*,L}(f)$  and the second inequality follows by Lemma A1.  $\square$

##### A.3.2. PROPOSITION 2

*Proof.* Notice that  $R_{D,L}(f) = R_{D^*,\beta L}(f)$ , then the proof is similar with the proof of Proposition 1.  $\square$

#### A.4. Proof of Theorem 3

*Proof.*  $\forall \mathbf{x} \in \mathcal{X}$ , we have

$$\begin{aligned} \tilde{\eta}(\mathbf{x}) &= (1 - \rho_{+1}(\mathbf{x}))\eta(\mathbf{x}) + (1 - \eta(\mathbf{x}))\rho_{-1}(\mathbf{x}) \\ &= (1 - \rho_{+1}(\mathbf{x}) - \rho_{-1}(\mathbf{x}))\eta(\mathbf{x}) + \rho_{-1}(\mathbf{x}) \\ &\geq \rho_{-1}(\mathbf{x}), \end{aligned}$$

where the first equality has been derived in the proof of Theorem 2 and the inequality follows by our bounded total noise assumption  $0 \leq \rho_{+1}(\mathbf{x}) + \rho_{-1}(\mathbf{x}) < 1$ . Similarly, we can prove  $\rho_{+1}(\mathbf{x}) \leq 1 - \tilde{\eta}(\mathbf{x})$ .  $\square$

## B. Extension to the Multiclass Classification

By the one-vs.-all strategy, our algorithm can be easily adapted for multiclass classification. In the multi-class case, our Theorem 1 still holds and keeps the idea of learning with distilled examples justified. An example  $(\mathbf{x}, y)$  is distilled if  $g_D^*(\mathbf{x}) = y$ , where  $g_D^*(\mathbf{x}) = \arg \max_i P_D(Y = i|\mathbf{x})$  is the Bayes optimal classifier under  $D$ . Like in the binary case, ILN can be modeled by flip rates  $\rho_y(\mathbf{x}) = P(\tilde{Y} \neq y|\mathbf{x}, Y = y)$  and  $\rho_{-y}(\mathbf{x}) = P(\tilde{Y} = y|\mathbf{x}, Y \neq y)$ . Let  $\eta_y(\mathbf{x}) = P(Y = y|\mathbf{x})$  and  $\tilde{\eta}_y(\mathbf{x}) = P(\tilde{Y} = y|\mathbf{x})$ . Easy to derive that  $\tilde{\eta}_y(\mathbf{x}) > \frac{1+UB(\rho_{-y}(\mathbf{x}))}{2} \implies \eta_y(\mathbf{x}) > \frac{1}{2} \implies (\mathbf{x}, y)$  is distilled. Hence, distilled examples can be collected out of noisy examples by thresholding  $\tilde{\eta}_y(\mathbf{x})$ . Other parts of our algorithm can be performed without special adaptations.

## References

Bartlett, P. L. and Mendelson, S. Rademacher and gaussian complexities: Risk bounds and structural results. *Journal of Machine Learning Research (JMLR)*, 3(Nov):463–482, 2002.
